# Supplementary material
Source: PubMed Central journal article supplement (PMC7253732)

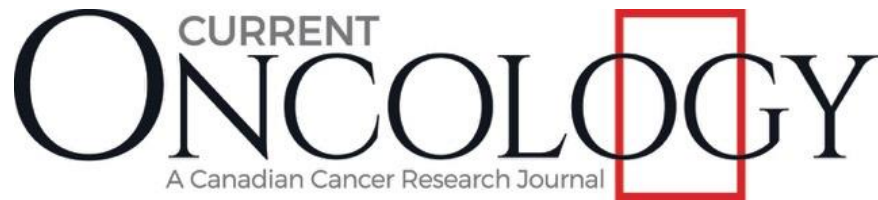

## **Supplemental Materials for**

### **A randomized trial of electronic Lung Cancer System Scale for quality of life assessment in patients with advanced non-small cell lung cancer**

JC Kuo, DM Graham, A Salvarrey, F Kassam, LW Le, FA Shepherd, R Burkes, R Feld, F Tang, PJ Hollen, RJ Gralla, NB Leighl

#### **Listing of Supplemental Material(s):**

Supplemental Figure 1: Sample output e-LCSS-QL

#### Correspondence:

Natasha Leighl MD MMSc FRCPC

Professor of Medicine, University of Toronto

Division of Medical Oncology,

Princess Margaret Cancer Centre

7-913 OPG, 700 University Avenue

Toronto ON M5G 1Z5

Tel. 416-946-4645

Fax 416-946-6546

Email: [Natasha.leighl@uhn.ca](mailto:Natasha.leighl@uhn.ca)

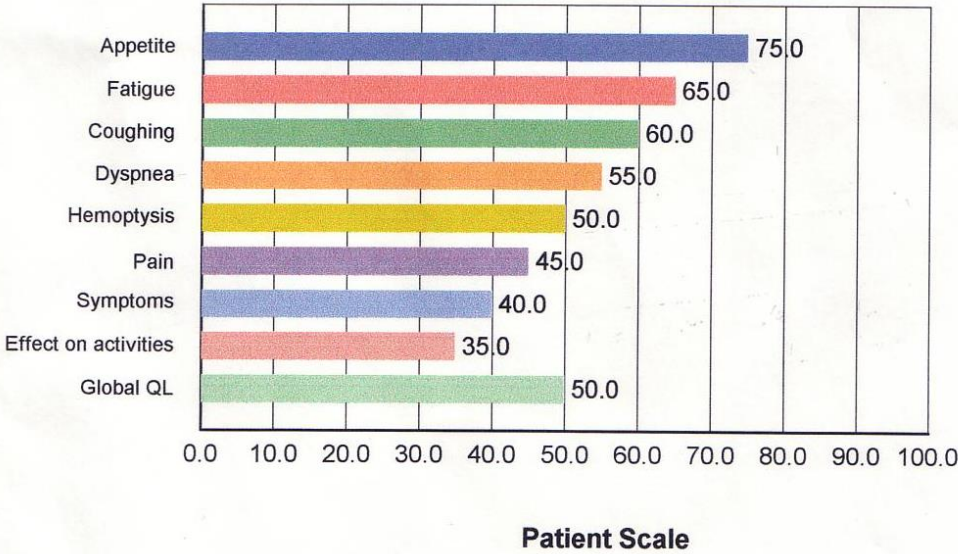

**Patient Scale Scores**

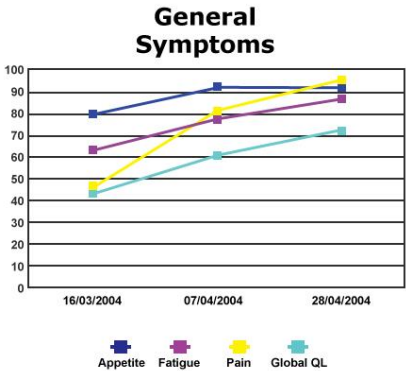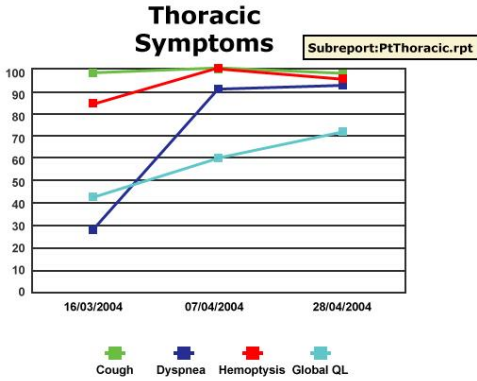

Supplement: CONC-27-e156-S001.pdf [file CONC-27-e156-S001.pdf]
